# Supplementary material for: Ternary complexes composed of naphthalene diimides and binucleating metallocavitands: preparation, characterisation and structure of [(Ni2L)2(NDI)][BPh4]2
Source: Royal Society of Chemistry journal article supplement (doi:10.1039/b907785e), 2009-01-01
Supplement: b907785e.pdf [file b907785e.pdf]

## Ternary Complexes Composed of Naphthalene Diimides and Binucleating Metallocavitands: Preparation, Characterisation and Structure of $[(\text{Ni}_2\text{L})_2(\text{NDI})][\text{BPh}_4]_2^{\dagger}$

Katrina A. Lee,<sup>a</sup> Vasile Lozan,<sup>b</sup> Steven J. Langford,<sup>a\*</sup> and Berthold Kersting<sup>b\*</sup>

Supporting Information

- 1) Cif-File for  $3[\text{BPh}_4]_2(\text{CH}_3\text{CN})_x$
- 2) Electronic absorption spectrum of  $3^+$ .

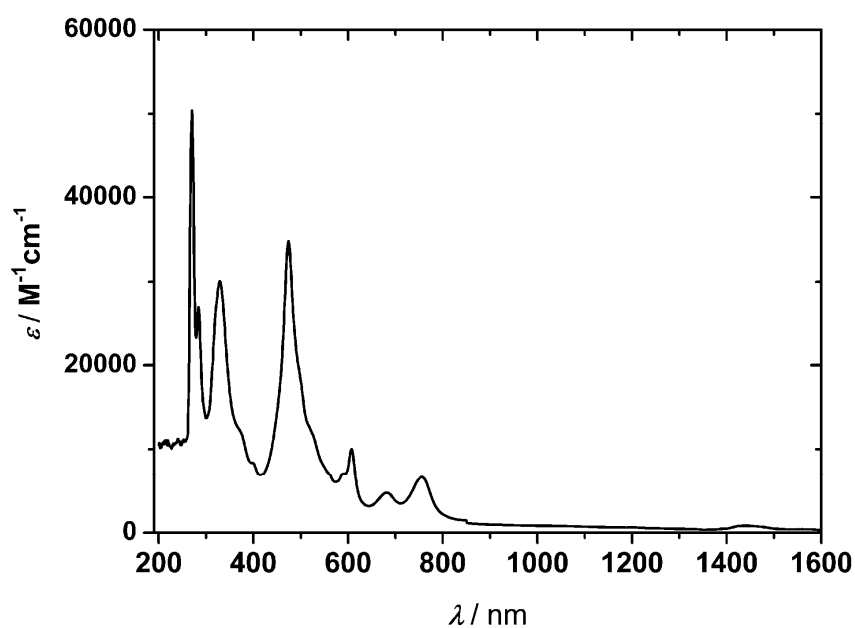

Figure S1. Electronic absorption spectrum of  $3^+$  in DMF. Sample concentration:  $3.5 \times 10^{-5}$  M. The cation  $3^+$  was generated by chemical reduction of  $3[\text{ClO}_4]_2$  with an aqueous solution of  $\text{Na}_2\text{S}_2\text{O}_4$  in  $\text{H}_2\text{O}$  under an argon atmosphere.
